# Supplementary material for: PE homeostasis rebalanced through mitochondria-ER lipid exchange prevents retinal degeneration in Drosophila
Source: PLoS Genet. 2020 Oct 16;16(10):e1009070. doi: 10.1371/journal.pgen.1009070 (PMC7592913; doi:10.1371/journal.pgen.1009070)
Supplement: S3 Data — Percentage of mitochondrial phospholipids measured in wild type, pect29 and pect29;GMR-Psd fly retinas at day1 and day9. (XLSX) [file pgen.1009070.s011.xlsx]

## Sheet: lipid percentage
Lipidomic analysis of mitochondial phospholipid levels in pect29 and pect29;GMR-Psd fly retinas at day1 and day9.
Total	wt-1	wt-2	wt-3	wt-4	pect29-1	pect29-2	pect29-3	pect29-4	pect29;GMR-Psd-1	pect29;GMR-Psd-2	pect29;GMR-Psd-3	pect29;GMR-Psd-4	wt D9-1	wt D9-2	wt D9-3	wt D9-4	pect29;GMR-Psd D9-1	pect29;GMR-Psd D9-2	pect29;GMR-Psd D9-3	pect29;GMR-Psd D9-4
PC	0.00102007	0.000822088	0.000694572	0.00063734	0.00203188	0.00178813	0.00124678	0.00131754	0.00130921	0.00138183	0.00147685	0.00140021	0.00113357	0.000549404	0.000488304	0.000623956	0.00109616	0.00094224	0.00084652	0.0009363
PE	0.000718464	0.000637326	0.0005684	0.000593616	0.000536506	0.000441078	0.000403994	0.000416956	0.000446892	0.000468878	0.000642605	0.000487777	0.000539143	0.000536583	0.000549776	0.000536278	0.000390623	0.000532421	0.000437304	0.000417196
PS	0.000292119	0.000214559	0.00021501	0.000218011	0.000279237	0.000205757	0.00019779	0.000194076	0.00016755	0.000159784	0.000155994	0.000158533	0.000204271	0.00019605	0.000168373	0.00015857	0.000100846	0.000125863	8.21869e-05	0.000102962
PA	1.16016e-05	1.01442e-05	9.11309e-06	1.07359e-05	1.18275e-05	1.01626e-05	9.73902e-06	9.11083e-06	1.09829e-05	9.5809e-06	1.14186e-05	9.60674e-06	8.03783e-06	7.96696e-06	7.60315e-06	7.96335e-06	7.35135e-06	9.33025e-06	6.34063e-06	8.57086e-06
PI	0.000101795	8.69676e-05	0.000100163	0.000111178	0.000143198	0.000117548	0.00013653	0.00011953	0.000146555	0.00013928	0.000133069	0.000130997	8.07262e-05	8.54975e-05	6.90988e-05	8.61861e-05	0.00010157	9.65681e-05	0.000114305	9.57097e-05
PG	2.24242e-05	1.85823e-05	1.82154e-05	1.84824e-05	2.27049e-05	1.90789e-05	2.01742e-05	1.99996e-05	1.76333e-05	1.87245e-05	1.86999e-05	1.67637e-05	2.14197e-05	1.86823e-05	2.02103e-05	2.73438e-05	1.29703e-05	1.56323e-05	1.412e-05	1.37869e-05
CL	6.74748e-05	4.39376e-05	4.00387e-05	4.88773e-05	4.49974e-05	3.05273e-05	3.42469e-05	3.7446e-05	4.49433e-05	4.63401e-05	4.40772e-05	5.17111e-05	3.16481e-05	2.37741e-05	2.45155e-05	2.93319e-05	3.77414e-05	3.62156e-05	2.72646e-05	3.00037e-05
LPC	2.92067e-05	2.73916e-05	1.86719e-05	1.77516e-05	2.12039e-05	2.51736e-05	2.39571e-05	3.075e-05	3.6448e-05	2.7099e-05	2.18487e-05	2.49498e-05	2.11261e-05	2.03469e-05	2.58461e-05	3.12665e-05	2.93383e-05	6.2003e-05	4.15817e-05	5.71154e-05
LPI	3.54129e-06	2.30002e-06	2.53098e-06	3.68041e-06	4.93192e-06	3.20157e-06	3.71721e-06	3.82155e-06	3.06199e-06	2.66101e-06	2.51559e-06	3.07858e-06	1.05857e-06	2.81745e-06	1.6697e-06	2.91527e-06	2.26503e-06	1.12541e-06	2.23699e-06	2.72717e-06
LPE	0.000307602	0.000340899	0.000265047	0.000376925	0.000119292	0.000139089	0.000103881	0.000154177	0.000106005	0.000103591	0.000151708	0.000147911	0.000292335	0.000284054	0.000336592	0.000381797	0.000256753	0.000464194	0.000384401	0.000342467
LPS	8.23135e-06	6.32481e-06	6.59969e-06	7.15811e-06	7.66707e-06	5.65909e-06	4.72798e-06	6.82616e-06	4.33103e-06	4.13054e-06	3.85354e-06	3.47095e-06	4.85172e-06	6.52071e-06	6.41953e-06	6.33237e-06	3.53326e-06	2.46802e-06	2.47151e-06	3.23931e-06
sum	0.00258253	0.00221052	0.00193836	0.00204376	0.00322344	0.00278541	0.00218554	0.00231023	0.00229361	0.0023619	0.00266264	0.00243501	0.00233819	0.0017317	0.00169841	0.00189194	0.00203915	0.00228806	0.00195873	0.00201008
Lipid percentage%	wt-1	wt-2	wt-3	wt-4	pect29-1	pect29-2	pect29-3	pect29-4	pect29;GMR-Psd-1	pect29;GMR-Psd-2	pect29;GMR-Psd-3	pect29;GMR-Psd-4	wt D9-1	wt D9-2	wt D9-3	wt D9-4	pect29;GMR-Psd D9-1	pect29;GMR-Psd D9-2	pect29;GMR-Psd D9-3	pect29;GMR-Psd D9-4
PC	0.39499	0.371898	0.358329	0.311847	0.630344	0.641965	0.570469	0.570306	0.570807	0.58505	0.554656	0.575033	0.484807	0.317263	0.287507	0.329797	0.537556	0.411807	0.432177	0.465803
PE	0.278201	0.288315	0.293237	0.290453	0.166439	0.158353	0.184849	0.180482	0.194842	0.198518	0.241342	0.200318	0.230582	0.30986	0.323701	0.283454	0.191562	0.232695	0.223259	0.207552
PS	0.113113	0.0970627	0.110924	0.106672	0.0866269	0.0738696	0.0904994	0.0840072	0.0730507	0.0676508	0.0585863	0.0651057	0.087363	0.113213	0.0991358	0.0838134	0.049455	0.0550086	0.0419592	0.0512229
PA	0.00449233	0.00458906	0.00470144	0.00525303	0.00366921	0.00364851	0.00445612	0.00394369	0.00478847	0.00405645	0.00428846	0.00394526	0.00343763	0.00460067	0.00447663	0.00420909	0.00360511	0.0040778	0.00323711	0.00426394
PI	0.0394167	0.0393426	0.051674	0.0543989	0.0444239	0.0422013	0.0624697	0.0517394	0.063897	0.0589696	0.0499764	0.0537973	0.0345251	0.0493721	0.0406845	0.0455543	0.04981	0.0422052	0.0583566	0.0476149

## Sheet: original data
	wt-1	wt-2	wt-3	wt-4	pect29-1	pect29-2	pect29-3	pect29-4	pect29;GMR-Psd-1	pect29;GMR-Psd-2	pect29;GMR-Psd-3	pect29;GMR-Psd-4	wt D9-1	wt D9-2	wt D9-3	wt D9-4	pect29;GMR-Psd D9-1	pect29;GMR-Psd D9-2	pect29;GMR-Psd D9-3	pect29;GMR-Psd D9-4
LPE16:2	2.31775e-05	2.10973e-05	2.09322e-05	1.94499e-05	7.80203e-06	5.0945e-06	6.37137e-06	9.4394e-06	9.71838e-06	7.81639e-06	1.71814e-05	1.14056e-05	1.52494e-05	1.36384e-05	1.47834e-05	1.69109e-05	9.30642e-06	1.87116e-05	1.5733e-05	2.30716e-05
LPE16:1	5.32484e-05	6.35008e-05	4.75218e-05	7.55638e-05	3.16604e-05	4.16211e-05	2.41004e-05	4.13668e-05	2.44455e-05	2.02473e-05	2.65641e-05	2.72467e-05	4.88847e-05	5.34248e-05	7.44066e-05	5.48212e-05	3.83564e-05	6.52261e-05	5.61237e-05	5.4449e-05
LPE18:3	0.000104599	0.000120108	9.39121e-05	0.000116699	3.82186e-05	5.00799e-05	3.96133e-05	4.03488e-05	3.39396e-05	4.24722e-05	5.43468e-05	6.45412e-05	0.000129782	0.000123592	0.000143037	0.000194847	0.000124549	0.00022771	0.000158895	0.000130795
LPE18:2	0.000109194	0.000118333	9.22149e-05	0.000145986	3.18866e-05	3.47964e-05	2.90867e-05	5.39527e-05	3.30425e-05	2.69336e-05	4.31362e-05	3.87428e-05	8.29526e-05	7.47759e-05	7.93018e-05	7.78646e-05	7.48862e-05	0.000137429	0.000135985	0.00012014
LPE18:1	1.73832e-05	1.78596e-05	1.04661e-05	1.92263e-05	9.72427e-06	7.49756e-06	4.70927e-06	9.06923e-06	4.85919e-06	6.12127e-06	1.04794e-05	5.97436e-06	1.54657e-05	1.86234e-05	2.50633e-05	3.73527e-05	9.65432e-06	1.51172e-05	1.76652e-05	1.40108e-05
PE30:1	4.09291e-05	3.63543e-05	2.28483e-05	2.59391e-05	2.44974e-05	1.56929e-05	1.99105e-05	1.85293e-05	2.98593e-05	3.83883e-05	5.45513e-05	2.84413e-05	1.25485e-05	1.03338e-05	9.44943e-06	9.15898e-06	7.68028e-06	1.11803e-05	6.424e-06	6.4608e-06
PE30:0	0.00011335	8.55773e-05	8.13245e-05	6.69138e-05	3.13474e-05	2.45756e-05	2.01002e-05	2.42306e-05	2.60981e-05	2.78484e-05	3.75353e-05	2.82554e-05	3.76456e-05	6.09402e-05	6.78549e-05	8.41482e-05	2.37553e-05	3.71229e-05	2.22006e-05	2.30866e-05
PE31:3	1.11811e-05	5.46923e-06	6.38978e-06	5.96829e-06	6.03728e-06	8.68536e-06	5.30948e-06	5.32123e-06	6.2175e-06	7.63897e-06	7.25683e-06	5.39083e-06	5.99665e-06	7.14671e-06	4.92576e-06	1.04947e-05	9.01986e-06	1.04205e-05	8.31341e-06	8.09754e-06
PE31:2	2.9748e-06	2.57375e-06	2.614e-06	3.44325e-06	2.20593e-06	2.46743e-06	5.11985e-06	2.56559e-06	2.76333e-06	2.12731e-06	4.62936e-06	3.53192e-06	3.88672e-06	4.2494e-06	1.40736e-06	3.53002e-06	4.37597e-06	2.60512e-06	1.41706e-06	3.87648e-06
PE31:1	4.20575e-06	2.78823e-06	4.16304e-06	3.90235e-06	2.08983e-06	4.14529e-06	2.08586e-06	2.28053e-06	2.53305e-06	4.06123e-06	3.75353e-06	4.83316e-06	2.10993e-06	9.6577e-07	1.10578e-06	2.00353e-06	2.23264e-06	1.95384e-06	1.79494e-06	2.23975e-06
PE32:3	2.9748e-06	2.68099e-06	2.22674e-06	3.78757e-06	3.25084e-06	1.48046e-06	1.70662e-06	2.18551e-06	1.38167e-06	3.19096e-06	2.50236e-06	7.4356e-07	1.99888e-06	2.41443e-06	2.01052e-06	5.7244e-07	1.87542e-06	2.38802e-06	1.70047e-06	9.4758e-07
PE32:2	2.01055e-05	2.25203e-05	1.76203e-05	2.30698e-05	1.54415e-05	1.35215e-05	1.45062e-05	1.36832e-05	1.8499e-05	1.86623e-05	2.89022e-05	2.16563e-05	1.46585e-05	1.07201e-05	1.26663e-05	1.24028e-05	1.37531e-05	1.1723e-05	1.13365e-05	1.10264e-05
PE32:1	8.08324e-05	9.0832e-05	8.03563e-05	6.72581e-05	7.11703e-05	5.94158e-05	6.26708e-05	4.58956e-05	7.18466e-05	6.04349e-05	9.40885e-05	7.16608e-05	5.19709e-05	3.68925e-05	4.31256e-05	3.68267e-05	4.14378e-05	5.86152e-05	3.87329e-05	4.72069e-05
PE32:0	4.94432e-05	4.21452e-05	4.31794e-05	3.79905e-05	1.9389e-05	1.36202e-05	1.02397e-05	8.647e-06	1.6273e-05	1.46978e-05	2.3397e-05	1.41277e-05	3.65351e-05	3.13876e-05	2.42267e-05	3.97843e-05	1.34851e-05	2.62683e-05	1.61545e-05	1.52475e-05
PE33:2	2.25674e-06	1.39412e-06	2.42037e-06	4.591e-06	2.43813e-06	7.8958e-07	1.04293e-06	1.99546e-06	2.30278e-06	2.4174e-06	4.75447e-06	2.97425e-06	7.7734e-07	4.8289e-07	3.71945e-06	1.5265e-06	2.32195e-06	2.60512e-06	2.73965e-06	1.89517e-06
PE33:1	1.2925e-05	1.12602e-05	1.38445e-05	1.60685e-05	1.1378e-05	8.98145e-06	9.19677e-06	9.69224e-06	9.21111e-06	1.26672e-05	7.63218e-06	9.10864e-06	4.66406e-06	2.89732e-06	7.13733e-06	5.43815e-06	6.96583e-06	8.46664e-06	1.66268e-05	1.06819e-05
PE34:2	7.82679e-05	8.62207e-05	6.16711e-05	7.78174e-05	5.79347e-05	5.75405e-05	4.64579e-05	4.81762e-05	5.28871e-05	5.89845e-05	8.99597e-05	6.72924e-05	6.75178e-05	6.26786e-05	7.00665e-05	5.85793e-05	5.43871e-05	6.55622e-05	5.93275e-05	5.34093e-05
PE34:1	5.10844e-05	4.57914e-05	3.74674e-05	5.32556e-05	6.85e-05	5.82314e-05	4.25706e-05	5.30223e-05	3.99916e-05	4.32231e-05	4.86708e-05	4.07101e-05	5.09715e-05	4.27837e-05	4.63424e-05	4.47455e-05	3.14356e-05	3.64717e-05	3.63712e-05	4.05738e-05
PE34:0	2.22597e-05	1.47991e-05	1.64585e-05	1.57242e-05	8.82372e-06	6.11923e-06	4.17173e-06	7.31669e-06	4.06824e-06	5.60836e-06	5.00471e-06	7.34268e-06	8.21763e-06	1.439e-05	1.21636e-05	9.92223e-06	4.46528e-06	4.99314e-06	4.34564e-06	3.35962e-06
PE35:4	1.84642e-06	3.21719e-06	1.16178e-06	2.86937e-06	2.08983e-06	1.38176e-06	1.32737e-06	1.80542e-06	1.07463e-06	1.16035e-06	1.3763e-06	7.4356e-07	7.7734e-07	1.64181e-06	6.0315e-07	7.6325e-07	7.1445e-07	1.30256e-06	2.73965e-06	1.55059e-06
PE35:3	2.02081e-05	1.47991e-05	1.16178e-05	9.18199e-06	2.99542e-05	1.68772e-05	1.17567e-05	1.56786e-05	1.28188e-05	1.54713e-05	1.96435e-05	1.46854e-05	1.8212e-05	2.25025e-05	2.3523e-05	2.51872e-05	1.12525e-05	2.70281e-05	1.52098e-05	1.41276e-05
PE35:2	2.51319e-05	1.93032e-05	1.76203e-05	1.4806e-05	1.9389e-05	2.03317e-05	1.4127e-05	2.01447e-05	1.54286e-05	1.3344e-05	1.68909e-05	1.72878e-05	2.15435e-05	3.27397e-05	2.70415e-05	2.4424e-05	8.12681e-06	2.30119e-05	1.42651e-05	1.45583e-05
PE35:1	8.92439e-06	4.93303e-06	4.84074e-06	4.93532e-06	6.15339e-06	4.14529e-06	2.18068e-06	4.7511e-06	3.53092e-06	2.12731e-06	4.87959e-06	5.29788e-06	5.33035e-06	4.34597e-06	7.53944e-06	2.28975e-06	2.85778e-06	3.14785e-06	3.68435e-06	2.49818e-06
PE35:0	1.33353e-06	1.0724e-06	9.6815e-07	9.182e-07	5.8051e-07	7.8958e-07	9.481e-08	1.52035e-06	2.3028e-07	2.9009e-07	6.2559e-07	5.5767e-07	2.221e-07	9.658e-08	6.0315e-07	4.7703e-07	8.93e-08	3.2564e-07	6.6129e-07	6.0301e-07
PE36:6	9.2321e-07	4.2896e-07	4.8407e-07	1.26252e-06	1.04491e-06	1.18437e-06	1.04293e-06	1.04524e-06	2.14926e-06	2.90088e-06	1.12606e-06	9.2945e-07	3.22042e-06	7.33986e-06	3.92051e-06	5.62896e-06	2.76847e-06	3.58204e-06	2.92859e-06	4.82407e-06
PE36:5	1.07708e-05	5.68371e-06	9.39104e-06	8.26379e-06	8.35932e-06	9.67234e-06	5.21466e-06	6.4615e-06	9.90194e-06	1.02498e-05	1.4889e-05	1.11534e-05	2.30982e-05	2.82005e-05	2.77451e-05	2.17526e-05	2.79526e-05	4.12477e-05	2.86246e-05	2.48095e-05
PE36:4	3.77491e-05	3.97859e-05	3.64992e-05	3.03006e-05	4.07517e-05	2.98066e-05	3.57442e-05	2.84116e-05	3.2853e-05	3.56808e-05	4.85457e-05	3.61557e-05	6.7962e-05	6.48999e-05	6.22255e-05	5.57172e-05	4.47421e-05	5.5793e-05	5.85717e-05	5.79749e-05
PE36:3	6.08294e-05	4.62203e-05	3.78546e-05	5.89943e-05	4.50474e-05	4.13542e-05	4.3898e-05	4.03844e-05	3.73817e-05	3.60676e-05	5.12983e-05	4.16395e-05	4.51969e-05	4.23974e-05	3.7094e-05	3.74946e-05	3.28645e-05	4.01623e-05	3.95832e-05	2.42926e-05
PE36:2	3.77491e-05	3.37805e-05	3.34979e-05	3.84496e-05	3.40178e-05	2.46743e-05	2.76851e-05	3.8959e-05	2.89382e-05	3.51973e-05	4.8921e-05	3.60628e-05	3.03164e-05	2.40477e-05	3.14646e-05	2.25158e-05	2.23264e-05	3.26725e-05	2.64518e-05	2.83414e-05
PE36:1	8.10375e-06	6.86334e-06	6.68023e-06	6.19785e-06	6.9661e-06	6.90881e-06	6.06797e-06	5.13119e-06	5.44991e-06	7.34889e-06	9.50895e-06	7.06384e-06	9.99441e-06	6.85698e-06	9.751e-06	7.25086e-06	7.23375e-06	5.75297e-06	6.70741e-06	4.22106e-06
PE37:3	3.48769e-06	2.46651e-06	4.84074e-06	4.24667e-06	6.9661e-06	4.34268e-06	4.17173e-06	4.37101e-06	3.37741e-06	2.51409e-06	5.50518e-06	3.81076e-06	6.10769e-06	5.02201e-06	4.82524e-06	5.43815e-06	5.98347e-06	6.72989e-06	4.06223e-06	5.68551e-06
PE37:2	5.02638e-06	4.71855e-06	6.09934e-06	4.36145e-06	6.73389e-06	2.56613e-06	5.11985e-06	2.85066e-06	6.67805e-06	4.54471e-06	5.12983e-06	2.8813e-06	5.99665e-06	5.11859e-06	4.52366e-06	5.72436e-06	4.55458e-06	7.70681e-06	4.818e-06	3.79034e-06
PE37:1	1.74385e-06	2.89547e-06	3.58215e-06	2.18072e-06	2.90254e-06	1.67785e-06	1.8962e-07	1.61537e-06	2.37954e-06	1.35374e-06	1.3763e-06	2.8813e-06	9.9944e-07	2.80074e-06	2.21157e-06	1.71731e-06	1.16097e-06	1.73675e-06	5.6682e-07	1.63674e-06
PE37:0	1.84642e-06	7.5068e-07	6.777e-07	9.182e-07	1.04491e-06	9.87e-08	2.8444e-07	2.8507e-07	7.6759e-07	6.7687e-07	2.5024e-07	5.5767e-07	6.6629e-07	2.8973e-07	5.0263e-07	7.6325e-07	8.0375e-07	1.84529e-06	9.447e-07	1.7229e-07
PA30:1	2.0892e-07	1.909e-07	1.2396e-07	1.7575e-07	1.6339e-07	1.1823e-07	1.4231e-07	9.929e-08	2.0364e-07	2.0038e-07	2.6396e-07	1.5045e-07	2.2874e-07	2.2664e-07	2.185e-07	1.6176e-07	1.7999e-07	1.8935e-07	1.5555e-07	2.1353e-07
PA32:2	4.1784e-07	3.2927e-07	2.9148e-07	2.9859e-07	3.5946e-07	1.8579e-07	2.3658e-07	2.1877e-07	4.6375e-07	3.7035e-07	4.4751e-07	3.1971e-07	4.1623e-07	3.7532e-07	3.4675e-07	2.3019e-07	2.7246e-07	2.8876e-07	2.7261e-07	3.6004e-07
PA32:1	9.1443e-07	6.2701e-07	7.4379e-07	7.6726e-07	7.2084e-07	6.3168e-07	5.6922e-07	6.3274e-07	9.0355e-07	9.0531e-07	1.07159e-06	8.8391e-07	5.1936e-07	5.5288e-07	5.4783e-07	3.4995e-07	5.9445e-07	5.8699e-07	4.2816e-07	6.4527e-07
PA32:0	4.1784e-07	3.713e-07	2.4123e-07	3.7229e-07	8.5155e-07	8.0564e-07	6.635e-07	6.1087e-07	6.8793e-07	5.6537e-07	6.2932e-07	5.1291e-07	2.5687e-07	2.9737e-07	2.7867e-07	3.1729e-07	3.6162e-07	4.5444e-07	3.2713e-07	3.9901e-07
PA34:3	7.714e-07	6.1124e-07	5.88e-07	6.0851e-07	8.2272e-07	6.3675e-07	6.2792e-07	5.587e-07	9.9254e-07	8.3196e-07	8.4259e-07	8.5826e-07	5.6435e-07	5.269e-07	4.5283e-07	5.2726e-07	6.1426e-07	8.0632e-07	4.9551e-07	8.1516e-07
PA34:2	2.06189e-06	2.20503e-06	1.81424e-06	2.39815e-06	2.33551e-06	2.15007e-06	2.02963e-06	1.69461e-06	2.18701e-06	1.98238e-06	2.38441e-06	1.80543e-06	1.4287e-06	1.41179e-06	1.15583e-06	1.57089e-06	1.44484e-06	1.96609e-06	1.34382e-06	1.74566e-06
PA34:1	1.44798e-06	1.24176e-06	1.16761e-06	1.31341e-06	1.42437e-06	1.18229e-06	1.25584e-06	1.16452e-06	1.32624e-06	1.19694e-06	1.63098e-06	1.22414e-06	7.6497e-07	8.7191e-07	8.2016e-07	8.8188e-07	8.7021e-07	1.16135e-06	7.6812e-07	8.4166e-07
PA36:4	1.38049e-06	1.32232e-06	1.2296e-06	1.4816e-06	1.58584e-06	1.36976e-06	1.33411e-06	1.19313e-06	1.44089e-06	1.154e-06	1.3408e-06	1.20191e-06	1.30683e-06	1.1967e-06	1.20175e-06	1.52579e-06	1.1311e-06	1.57003e-06	9.7338e-07	1.34665e-06
PA36:3	1.61191e-06	1.55351e-06	1.17264e-06	1.48538e-06	1.50703e-06	1.4255e-06	1.25762e-06	1.18303e-06	1.4272e-06	1.06991e-06	1.30933e-06	1.18994e-06	8.8497e-07	9.4986e-07	8.9458e-07	9.7987e-07	7.992e-07	1.0509e-06	7.3926e-07	9.2582e-07
PA36:2	1.97511e-06	1.34334e-06	1.37366e-06	1.39656e-06	1.64543e-06	1.28531e-06	1.21137e-06	1.40516e-06	1.01136e-06	9.894e-07	1.25689e-06	1.13523e-06	1.31245e-06	1.14762e-06	1.34266e-06	1.07941e-06	8.4379e-07	9.5622e-07	5.9493e-07	9.3517e-07
PA36:1	3.9374e-07	3.4853e-07	3.6687e-07	4.3843e-07	4.1136e-07	3.7158e-07	4.1091e-07	3.5003e-07	3.3883e-07	3.1489e-07	2.4124e-07	3.2484e-07	3.5436e-07	4.0997e-07	3.4358e-07	3.3906e-07	2.3943e-07	2.9981e-07	2.4214e-07	3.429e-07
PS 32:3	2.1685e-07	2.5152e-07	2.0856e-07	2.5959e-07	1.6278e-07	1.8854e-07	1.8339e-07	1.0286e-07	1.9131e-07	2.1577e-07	2.4597e-07	2.3638e-07	1.4511e-07	1.0446e-07	9.402e-08	5.707e-08	5.852e-08	8.149e-08	5.984e-08	7.326e-08
PS 32:2	1.49121e-06	1.28827e-06	1.23708e-06	1.24602e-06	1.13943e-06	6.7377e-07	8.5104e-07	6.6004e-07	1.41091e-06	1.48885e-06	1.55781e-06	1.07121e-06	3.8486e-07	3.2643e-07	1.9065e-07	2.7295e-07	2.2849e-07	3.4052e-07	1.9512e-07	4.0295e-07
PS 32:1	3.40126e-06	2.58268e-06	2.3456e-06	2.67699e-06	2.42502e-06	1.97694e-06	1.91698e-06	1.61725e-06	2.06454e-06	2.14542e-06	2.27143e-06	2.34289e-06	9.306e-07	8.3827e-07	8.9059e-07	6.65e-07	7.9136e-07	1.01864e-06	5.7235e-07	6.8292e-07
PS 32:0	5.9114e-07	4.2329e-07	4.9141e-07	4.0236e-07	5.0826e-07	4.1868e-07	2.8368e-07	3.686e-07	4.0387e-07	4.5929e-07	4.4639e-07	5.6553e-07	3.9748e-07	3.8127e-07	2.5333e-07	3.4987e-07	3.2602e-07	4.773e-07	3.0178e-07	3.6894e-07
PS 34:4	1.33377e-06	8.8645e-07	9.0853e-07	8.7935e-07	6.9761e-07	5.1295e-07	6.0174e-07	5.6004e-07	1.14786e-06	1.28232e-06	1.01425e-06	1.16696e-06	3.3438e-07	4.4133e-07	2.8729e-07	4.4168e-07	6.5761e-07	8.4693e-07	5.7495e-07	5.8873e-07
PS 34:3	8.59672e-06	6.28187e-06	5.82829e-06	5.87964e-06	6.93956e-06	5.53432e-06	5.16066e-06	4.68031e-06	8.40963e-06	7.94976e-06	7.43075e-06	8.02209e-06	4.50472e-06	4.29578e-06	3.71121e-06	3.32251e-06	3.76454e-06	5.64908e-06	3.20776e-06	4.29117e-06
PS 34:2	2.30721e-05	1.81585e-05	1.69678e-05	1.80088e-05	2.07954e-05	1.47147e-05	1.39518e-05	1.31694e-05	1.50815e-05	1.54556e-05	1.45487e-05	1.41142e-05	9.99367e-06	9.77976e-06	8.04139e-06	7.85095e-06	7.61268e-06	1.0166e-05	6.07471e-06	8.66083e-06
PS 34:1	1.4615e-05	1.1435e-05	1.15109e-05	1.14316e-05	1.55434e-05	1.065e-05	1.09575e-05	1.05893e-05	7.93136e-06	7.81104e-06	7.16656e-06	6.92096e-06	7.10093e-06	6.54683e-06	5.8528e-06	5.59541e-06	3.71996e-06	4.4238e-06	2.9424e-06	3.63441e-06
PS 36:6	5.51925e-06	3.67771e-06	4.17409e-06	3.51416e-06	5.78352e-06	4.18124e-06	4.06893e-06	4.1917e-06	3.2496e-06	2.92837e-06	2.82715e-06	3.34528e-06	1.29905e-05	1.36786e-05	1.19015e-05	1.04911e-05	4.37199e-06	6.00415e-06	3.25979e-06	4.19959e-06
PS 36:5	2.44178e-05	1.68519e-05	1.81963e-05	1.84339e-05	2.28318e-05	1.6212e-05	1.60923e-05	1.54582e-05	1.37716e-05	1.19724e-05	1.20495e-05	1.37282e-05	3.14163e-05	2.96213e-05	2.64042e-05	2.48928e-05	1.08004e-05	1.65834e-05	9.52963e-06	1.20728e-05
PS 36:4	4.25915e-05	2.9069e-05	3.01443e-05	2.95734e-05	4.41155e-05	3.16227e-05	3.13967e-05	2.9782e-05	2.63582e-05	2.27889e-05	2.2848e-05	2.43864e-05	3.0287e-05	2.86864e-05	2.61979e-05	2.33593e-05	1.59053e-05	2.07133e-05	1.28467e-05	1.69737e-05
PS 36:3	5.04902e-05	3.68324e-05	3.6544e-05	3.64655e-05	5.52142e-05	3.87874e-05	3.72336e-05	3.6711e-05	3.19938e-05	3.06554e-05	3.01633e-05	3.04187e-05	2.64416e-05	2.49443e-05	2.04704e-05	2.01311e-05	1.39185e-05	1.77796e-05	1.09163e-05	1.39411e-05
PS 36:2	8.25897e-05	5.91502e-05	5.94115e-05	6.14442e-05	7.33354e-05	5.52794e-05	5.18617e-05	5.16748e-05	3.43134e-05	3.37318e-05	3.27141e-05	3.15767e-05	4.97822e-05	4.72354e-05	3.86948e-05	3.60662e-05	2.05615e-05	2.36732e-05	1.59608e-05	2.01214e-05
PS 36:1	2.56951e-05	2.14743e-05	2.09533e-05	2.21947e-05	2.36025e-05	2.03877e-05	1.88632e-05	2.02642e-05	1.79831e-05	1.75086e-05	1.74002e-05	1.71872e-05	2.15362e-05	2.0907e-05	1.89086e-05	1.8543e-05	1.54734e-05	1.52388e-05	1.3726e-05	1.45089e-05
PS 38:5	1.8714e-07	1.779e-07	1.8856e-07	1.9793e-07	2.0928e-07	1.8854e-07	1.4614e-07	1.5715e-07	1.2754e-07	8.323e-08	1.3665e-07	1.3166e-07	1.3565e-07	1.7758e-07	1.3581e-07	1.3647e-07	1.2261e-07	1.6589e-07	1.1447e-07	1.2298e-07
PS 38:4	4.9014e-07	5.4598e-07	4.3998e-07	4.0236e-07	3.8535e-07	2.8559e-07	2.407e-07	2.5145e-07	3.0822e-07	3.2366e-07	4.0388e-07	2.0646e-07	3.2177e-07	3.656e-07	3.2907e-07	3.5235e-07	2.5078e-07	3.6962e-07	2.3935e-07	3.4015e-07
PS 38:3	1.96055e-06	1.72383e-06	1.50279e-06	1.51534e-06	1.4218e-06	1.20335e-06	1.16624e-06	9.3149e-07	8.2901e-07	8.7851e-07	8.6242e-07	9.1561e-07	1.2082e-06	1.40494e-06	9.7416e-07	1.02479e-06	5.0714e-07	6.5775e-07	3.9804e-07	4.9976e-07
PS 38:2	3.41017e-06	2.6655e-06	2.63702e-06	2.50501e-06	2.93993e-06	1.96862e-06	2.00581e-06	1.97442e-06	1.33651e-06	1.43336e-06	1.21467e-06	1.44523e-06	2.80756e-06	2.80205e-06	2.2565e-06	2.27787e-06	9.9756e-07	9.0804e-07	6.8942e-07	8.1375e-07
PS 38:1	1.2298e-06	9.386e-07	1.08852e-06	8.5339e-07	9.833e-07	8.1518e-07	6.9917e-07	8.0862e-07	5.3407e-07	5.8259e-07	5.4357e-07	6.134e-07	3.13879e-06	3.05536e-06	2.39492e-06	2.34486e-06	6.2417e-07	5.879e-07	4.917e-07	5.8349e-07
PS 38:0	2.1982e-07	1.4416e-07	2.3142e-07	1.2655e-07	2.0264e-07	1.5527e-07	1.0889e-07	1.2287e-07	1.0363e-07	8.939e-08	1.488e-07	1.3764e-07	4.1325e-07	4.57e-07	3.8392e-07	3.9453e-07	1.5326e-07	1.7753e-07	8.585e-08	8.111e-08
LPS16:1	4.0696e-07	3.1593e-07	3.857e-07	2.9852e-07	3.023e-07	1.7191e-07	1.0602e-07	2.0287e-07	2.6836e-07	2.6201e-07	2.733e-07	2.1843e-07	1.6088e-07	2.4025e-07	1.0969e-07	1.5881e-07	8.359e-08	1.1351e-07	1.3008e-07	1.1251e-07
LPS18:1	7.82439e-06	6.00888e-06	6.21399e-06	6.85958e-06	7.36477e-06	5.48718e-06	4.62196e-06	6.62329e-06	4.06266e-06	3.86853e-06	3.58024e-06	3.25252e-06	4.69084e-06	6.28046e-06	6.30984e-06	6.17356e-06	3.44967e-06	2.35451e-06	2.34143e-06	3.1268e-06
CL62:3(16:1)	6.2454e-07	3.079e-07	2.4916e-07	6.1109e-07	1.7944e-07	1.6229e-07	2.873e-07	2.8829e-07	4.2661e-07	4.5013e-07	4.3972e-07	4.8087e-07	2.2163e-07	2.0859e-07	1.9028e-07	2.4653e-07	2.504e-07	2.902e-07	1.9528e-07	2.8266e-07
CL64:4(16:1)	6.17229e-06	3.83803e-06	3.43165e-06	2.60121e-06	1.89556e-06	1.21425e-06	9.6449e-07	1.81129e-06	3.19652e-06	2.33128e-06	4.05347e-06	3.64187e-06	5.71035e-06	3.70048e-06	4.30744e-06	4.50764e-06	4.08776e-06	5.71585e-06	3.02971e-06	4.03557e-06
CL66:5(16:1)	1.27589e-05	8.10893e-06	6.74438e-06	7.59776e-06	4.22177e-06	2.72409e-06	3.10749e-06	4.28654e-06	6.13403e-06	6.92666e-06	4.12469e-06	6.40687e-06	4.02854e-06	4.29375e-06	3.67043e-06	6.30901e-06	3.63704e-06	4.62333e-06	3.36169e-06	3.96001e-06
CL66:4(16:1)	5.86459e-06	3.46916e-06	2.84838e-06	4.09789e-06	1.96407e-06	1.21135e-06	1.39544e-06	2.30634e-06	2.77296e-06	3.0132e-06	2.53922e-06	3.20697e-06	1.76004e-06	1.42222e-06	1.47258e-06	1.21306e-06	1.72462e-06	1.84933e-06	1.35862e-06	2.47955e-06
CL68:6(18:2)	1.09706e-05	7.50839e-06	6.72456e-06	1.24767e-05	6.55451e-06	3.98761e-06	5.46742e-06	5.44262e-06	6.8166e-06	7.35664e-06	7.87159e-06	7.54893e-06	1.88064e-06	1.95589e-06	2.18681e-06	2.94719e-06	3.52123e-06	3.69013e-06	2.88464e-06	2.5915e-06
CL68:5(16:1)	6.62318e-06	4.61234e-06	3.56189e-06	3.14695e-06	2.47956e-06	2.18507e-06	2.01694e-06	1.86662e-06	3.58352e-06	3.60778e-06	3.38769e-06	3.45801e-06	1.32329e-06	1.42493e-06	1.22991e-06	1.26068e-06	1.18313e-06	1.91477e-06	1.43953e-06	1.9898e-06
CL70:7(18:2)	1.60004e-05	1.07703e-05	1.09603e-05	1.24603e-05	1.88773e-05	1.37277e-05	1.49248e-05	1.46418e-05	1.44895e-05	1.72495e-05	1.40648e-05	1.81281e-05	1.34219e-05	7.91567e-06	8.08541e-06	9.55036e-06	1.81351e-05	1.36737e-05	1.0445e-05	1.01001e-05
CL70:6(18:2)	8.46025e-06	5.32263e-06	5.51839e-06	5.88541e-06	8.82527e-06	5.31488e-06	6.08306e-06	6.80255e-06	7.52355e-06	5.40495e-06	7.59599e-06	8.8395e-06	3.30171e-06	2.85257e-06	3.3726e-06	3.29738e-06	5.20204e-06	4.45831e-06	4.55014e-06	4.56451e-06
PG30:1	3.4624e-07	1.7236e-07	3.0819e-07	2.3718e-07	1.0364e-07	2.3891e-07	1.3481e-07	1.2245e-07	1.4508e-07	2.3396e-07	1.0952e-07	9.513e-08	1.5294e-07	2.4565e-07	1.1819e-07	1.4496e-07	6.87e-08	1.0138e-07	2.1286e-07	1.3593e-07
PG30:0	3.5982e-07	3.7756e-07	6.0015e-07	2.6353e-07	3.5875e-07	1.9113e-07	2.1411e-07	4.5713e-07	2.5994e-07	2.1887e-07	3.1486e-07	4.3489e-07	2.0647e-07	1.4487e-07	1.0575e-07	8.154e-08	1.5114e-07	3.3792e-07	2.7737e-07	1.2298e-07
PG32:2	1.35102e-06	7.469e-07	9.0834e-07	6.9397e-07	6.7764e-07	5.3244e-07	5.3925e-07	6.0407e-07	7.254e-07	7.2453e-07	9.0351e-07	4.6207e-07	7.7236e-07	4.4092e-07	4.9764e-07	7.067e-07	3.9158e-07	5.204e-07	5.3539e-07	5.2429e-07
PG32:1	4.0191e-06	3.44725e-06	2.2384e-06	3.54011e-06	3.07728e-06	2.13657e-06	2.44247e-06	2.13873e-06	2.8593e-06	2.83018e-06	2.78582e-06	2.35793e-06	2.10297e-06	1.51801e-06	1.60488e-06	1.82111e-06	1.3671e-06	1.85857e-06	1.74807e-06	2.12952e-06
PG32:0	5.3633e-07	6.2379e-07	8.5967e-07	8.1695e-07	9.0086e-07	7.577e-07	9.5161e-07	1.02855e-06	6.4682e-07	6.4151e-07	6.6394e-07	8.426e-07	8.7942e-07	5.165e-07	6.0338e-07	7.8824e-07	4.6028e-07	7.975e-07	8.3211e-07	8.2851e-07
PG34:4	1.4257e-07	9.029e-08	4.866e-08	1.2298e-07	1.5944e-07	1.9113e-07	1.3481e-07	1.7142e-07	1.0277e-07	1.0566e-07	1.8481e-07	8.154e-08	1.1471e-07	1.1338e-07	1.0575e-07	1.359e-07	1.1679e-07	1.622e-07	5.16e-08	1.2945e-07
PG34:3	1.35781e-06	9.1927e-07	9.4889e-07	1.30009e-06	1.0922e-06	1.21504e-06	1.53844e-06	1.42038e-06	1.22714e-06	1.40377e-06	1.50585e-06	9.1055e-07	1.18531e-06	9.5742e-07	8.8953e-07	1.97513e-06	6.389e-07	8.5832e-07	8.7726e-07	9.8385e-07
PG34:2	6.10334e-06	5.05597e-06	4.0794e-06	3.72458e-06	6.0589e-06	6.2527e-06	5.56693e-06	4.79173e-06	5.16245e-06	4.58113e-06	5.07198e-06	4.73624e-06	3.73182e-06	2.6581e-06	3.50212e-06	4.68414e-06	3.59293e-06	4.14293e-06	3.93478e-06	3.27519e-06
PG34:1	2.83102e-06	2.2243e-06	2.10053e-06	2.24881e-06	2.69462e-06	1.60413e-06	2.32352e-06	2.53056e-06	1.72283e-06	2.30943e-06	2.03974e-06	1.72597e-06	1.17002e-06	1.54321e-06	7.9e-07	1.56742e-06	1.29153e-06	1.4801e-06	9.7402e-07	1.13273e-06
PG36:5	2.7156e-07	1.2312e-07	2.6763e-07	1.9326e-07	4.7833e-07	4.71e-07	3.5685e-07	6.0407e-07	3.1434e-07	2.1887e-07	2.1219e-07	3.6014e-07	9.6354e-07	9.1963e-07	1.0326e-06	1.60366e-06	5.0837e-07	4.1227e-07	2.6447e-07	3.6247e-07
PG36:4	1.46643e-06	1.34607e-06	2.02753e-06	1.75688e-06	3.2447e-06	2.49152e-06	2.58521e-06	2.8081e-06	1.55962e-06	1.5849e-06	2.01236e-06	1.78034e-06	5.10066e-06	5.51775e-06	6.02763e-06	7.8371e-06	1.87547e-06	1.85857e-06	1.81258e-06	1.64407e-06
PG36:3	2.52552e-06	2.45411e-06	2.76556e-06	2.50355e-06	2.73448e-06	1.67922e-06	2.17285e-06	2.1224e-06	1.84978e-06	2.4e-06	1.86862e-06	1.98419e-06	3.86947e-06	3.20609e-06	3.70739e-06	4.65696e-06	1.33962e-06	1.86533e-06	1.56746e-06	1.34632e-06
PG36:2	9.0294e-07	8.454e-07	9.4889e-07	8.3452e-07	9.8856e-07	1.11948e-06	9.754e-07	9.2243e-07	9.0071e-07	1.13207e-06	8.2822e-07	7.2029e-07	9.559e-07	8.2514e-07	1.05748e-06	1.14159e-06	1.05109e-06	1.06783e-06	7.9986e-07	9.968e-07
PG36:1	1.6294e-07	6.566e-08	7.299e-08	2.0204e-07	1.3553e-07	1.297e-07	1.5067e-07	1.8775e-07	1.0277e-07	2.0377e-07	1.2321e-07	1.5629e-07	9.177e-08	6.299e-08	1.1197e-07	1.5402e-07	1.0992e-07	1.4869e-07	1.9351e-07	1.2945e-07
PG36:0	4.752e-08	9.029e-08	4.055e-08	4.392e-08	0	6.826e-08	8.723e-08	8.979e-08	5.441e-08	1.3585e-07	7.529e-08	1.1552e-07	1.2235e-07	1.26e-08	5.598e-08	4.53e-08	6.87e-09	2.028e-08	3.87e-08	4.531e-08
LPI16:1	6.4856e-07	3.7951e-07	3.842e-07	7.2289e-07	6.0067e-07	3.1445e-07	5.2697e-07	4.4471e-07	6.0519e-07	5.0595e-07	4.8144e-07	5.2669e-07	1.7034e-07	4.277e-07	2.7856e-07	5.2359e-07	3.534e-07	1.0734e-07	2.8433e-07	4.1956e-07
LPI16:0	2.14468e-06	1.31858e-06	1.65167e-06	2.34208e-06	3.20424e-06	2.10342e-06	2.38842e-06	2.49571e-06	1.66975e-06	1.37901e-06	1.25688e-06	1.78047e-06	4.8873e-07	1.76272e-06	1.0446e-06	1.82932e-06	1.26527e-06	6.1386e-07	1.39028e-06	1.58861e-06
LPI18:0	7.4806e-07	6.0192e-07	4.9511e-07	6.1544e-07	1.12701e-06	7.8369e-07	8.0183e-07	8.8113e-07	7.8706e-07	7.7605e-07	7.7728e-07	7.7142e-07	3.995e-07	6.2702e-07	3.4654e-07	5.6237e-07	6.4637e-07	4.0421e-07	5.6238e-07	7.19e-07
PI 32:3	4.761e-08	7.94e-08	3.222e-08	3.272e-08	1.0959e-07	6.705e-08	8.526e-08	7.623e-08	8.853e-08	1.4563e-07	1.1958e-07	1.2389e-07	4.27e-08	8.345e-08	5.395e-08	4.124e-08	6.133e-08	5.136e-08	9.204e-08	8.58e-08
PI 32:2	1.12404e-06	9.6967e-07	1.2149e-06	9.2556e-07	9.267e-07	7.3287e-07	1.00684e-06	8.3851e-07	1.39094e-06	1.46902e-06	1.60559e-06	1.35435e-06	9.4516e-07	1.071e-06	8.7594e-07	1.0496e-06	1.05494e-06	9.4062e-07	1.09645e-06	9.2319e-07
PI 32:1	3.85677e-06	3.46987e-06	4.05031e-06	4.95268e-06	3.31457e-06	2.2407e-06	3.00963e-06	2.55522e-06	3.90873e-06	3.80271e-06	3.95153e-06	3.60141e-06	3.0936e-06	3.17128e-06	2.82142e-06	3.6499e-06	3.73785e-06	3.45267e-06	3.38337e-06	2.87253e-06
PI 32:0	2.22767e-06	2.15051e-06	2.20805e-06	2.97535e-06	4.17013e-06	2.87065e-06	3.69355e-06	2.99988e-06	1.99113e-06	1.7621e-06	2.08568e-06	1.69209e-06	1.36825e-06	1.66313e-06	1.57257e-06	2.192e-06	2.06432e-06	1.96791e-06	2.13087e-06	2.10206e-06
PI 33:3	5.782e-08	5.237e-08	2.464e-08	1.0985e-07	1.788e-07	1.1851e-07	1.4332e-07	1.4293e-07	1.4104e-07	1.5109e-07	1.7234e-07	1.2899e-07	3.299e-08	2.384e-08	3.65e-08	2.268e-08	4.381e-08	3.371e-08	5.602e-08	8.751e-08
PI 33:2	3.6731e-07	3.3618e-07	3.2221e-07	3.8799e-07	5.7101e-07	4.2569e-07	5.9866e-07	4.6372e-07	5.3867e-07	4.7147e-07	3.7985e-07	5.0746e-07	1.6691e-07	1.3313e-07	1.2219e-07	1.7115e-07	9.463e-08	8.828e-08	1.5006e-07	1.3041e-07
PI 33:1	5.6287e-07	4.7977e-07	3.6011e-07	6.8248e-07	6.4984e-07	3.1498e-07	5.2247e-07	3.859e-07	6.317e-07	6.2802e-07	6.3309e-07	5.2273e-07	3.474e-07	2.7222e-07	2.3485e-07	3.0931e-07	3.6625e-07	2.8893e-07	3.2613e-07	2.471e-07
PI 33:0	2.8569e-07	3.4462e-07	3.658e-07	3.4825e-07	3.7875e-07	3.3993e-07	4.8618e-07	2.7791e-07	3.181e-07	2.6031e-07	3.183e-07	2.0875e-07	3.4158e-07	2.3447e-07	2.1422e-07	2.4951e-07	2.4183e-07	2.8251e-07	3.1413e-07	3.2432e-07
PI 34:3	4.45535e-06	3.35669e-06	4.64544e-06	4.60442e-06	6.43304e-06	5.86449e-06	7.23471e-06	6.22527e-06	8.34713e-06	7.04658e-06	7.18908e-06	6.64784e-06	3.56132e-06	3.76938e-06	3.56089e-06	3.97571e-06	3.89557e-06	5.19104e-06	4.38378e-06	4.88536e-06
PI 34:2	1.63396e-05	1.37401e-05	1.43385e-05	1.65829e-05	2.2417e-05	1.9162e-05	2.21975e-05	1.98207e-05	2.1434e-05	1.85503e-05	1.71428e-05	1.58732e-05	1.20309e-05	1.25858e-05	1.09017e-05	1.18467e-05	1.11873e-05	8.04499e-06	1.05083e-05	1.03456e-05
PI 34:1	1.31161e-05	1.08488e-05	1.07882e-05	1.27545e-05	9.93603e-06	9.70969e-06	1.01627e-05	9.36172e-06	9.63303e-06	9.24739e-06	8.63112e-06	8.65221e-06	8.54136e-06	9.69467e-06	7.78985e-06	8.86905e-06	7.78062e-06	6.88287e-06	8.3794e-06	7.63091e-06
PI 34:0	1.71752e-06	1.42579e-06	1.58639e-06	1.23408e-06	1.63422e-06	1.54682e-06	1.38599e-06	1.50867e-06	1.36243e-06	1.44172e-06	1.15539e-06	9.1648e-07	1.98541e-06	1.97907e-06	1.67254e-06	2.10127e-06	1.61921e-06	1.6212e-06	2.11286e-06	1.55295e-06
PI 35:5	2.721e-08	1.689e-08	2.464e-08	5.843e-08	4.807e-08	3.275e-08	5.987e-08	3.653e-08	1.801e-08	2.913e-08	1.759e-08	2.376e-08	2.717e-08	1.391e-08	3.174e-08	3.712e-08	3.33e-08	5.457e-08	4.602e-08	5.491e-08
PI 35:4	2.211e-08	2.027e-08	2.653e-08	5.142e-08	5.576e-08	6.393e-08	1.1066e-07	4.764e-08	1.1854e-07	1.0558e-07	1.741e-07	6.28e-08	2.329e-08	2.782e-08	3.332e-08	1.856e-08	7.711e-08	7.384e-08	9.404e-08	5.148e-08
PI 35:3	2.6358e-07	2.3819e-07	3.1083e-07	2.8281e-07	5.9793e-07	3.181e-07	6.9118e-07	4.8436e-07	5.9269e-07	6.2438e-07	6.0319e-07	5.1934e-07	1.5332e-07	1.9473e-07	2.3644e-07	2.392e-07	3.4873e-07	3.5795e-07	4.6819e-07	4.0497e-07
PI 35:2	6.1559e-07	6.7235e-07	7.0317e-07	7.2689e-07	1.07858e-06	9.652e-07	1.18462e-06	1.01319e-06	1.03082e-06	1.11406e-06	1.13429e-06	8.8253e-07	4.2891e-07	4.6894e-07	2.3961e-07	5.2996e-07	5.7303e-07	5.602e-07	5.3622e-07	4.5645e-07
PI 35:1	4.0132e-07	4.8146e-07	3.9802e-07	5.2589e-07	3.9798e-07	2.7755e-07	3.6282e-07	3.5573e-07	5.2366e-07	4.2414e-07	4.9768e-07	4.5484e-07	3.4934e-07	2.7222e-07	2.5548e-07	2.9694e-07	3.3646e-07	2.7127e-07	2.9012e-07	2.6083e-07
PI 35:0	1.1734e-07	1.2163e-07	1.6868e-07	1.4725e-07	1.442e-07	1.3098e-07	1.6508e-07	1.2228e-07	1.3504e-07	1.5655e-07	1.3541e-07	1.2389e-07	1.5332e-07	2.5036e-07	1.4758e-07	2.0002e-07	1.8575e-07	1.3644e-07	1.5206e-07	1.184e-07
PI 36:6	3.384e-07	2.3313e-07	3.5632e-07	2.8748e-07	2.30328e-06	1.67624e-06	2.19871e-06	1.71036e-06	2.65133e-06	2.52665e-06	2.15954e-06	2.65099e-06	1.1897e-06	1.57372e-06	9.4576e-07	1.45377e-06	4.70342e-06	4.53614e-06	4.82996e-06	3.98619e-06
PI 36:5	3.16636e-06	2.34985e-06	3.59922e-06	3.23244e-06	1.54443e-05	1.16791e-05	1.30617e-05	1.10387e-05	1.58206e-05	1.52122e-05	1.34703e-05	1.38727e-05	7.64472e-06	6.80157e-06	6.03162e-06	8.16588e-06	1.83659e-05	1.60911e-05	2.06594e-05	1.63853e-05
PI 36:4	1.32457e-05	1.15467e-05	1.4558e-05	1.67582e-05	3.25133e-05	2.62085e-05	2.98994e-05	2.38827e-05	3.14543e-05	2.91466e-05	2.91488e-05	2.94702e-05	1.5178e-05	1.79561e-05	1.2232e-05	1.73184e-05	2.25245e-05	2.21734e-05	2.58592e-05	2.09207e-05
PI 36:3	2.86032e-05	2.52641e-05	2.931e-05	3.22551e-05	2.8759e-05	2.37105e-05	2.7967e-05	2.63965e-05	3.15386e-05	3.29736e-05	3.02046e-05	3.07365e-05	1.56508e-05	1.54398e-05	1.26762e-05	1.57297e-05	1.42627e-05	1.55072e-05	1.85147e-05	1.44303e-05
PI 36:2	8.67603e-06	6.95832e-06	8.5119e-06	8.68997e-06	8.47677e-06	7.01836e-06	8.18894e-06	7.80541e-06	1.02377e-05	9.231e-06	9.46996e-06	9.52116e-06	5.39148e-06	5.44841e-06	4.77008e-06	5.7223e-06	5.81268e-06	5.93423e-06	7.31097e-06	5.44133e-06
PI 36:1	7.6183e-07	8.9027e-07	1.12961e-06	1.29719e-06	1.00552e-06	8.6696e-07	8.1454e-07	9.0997e-07	1.06233e-06	1.19233e-06	1.23804e-06	1.08619e-06	8.1901e-07	1.09087e-06	7.1726e-07	8.867e-07	8.429e-07	9.5346e-07	1.24851e-06	9.3692e-07
PI 36:0	1.3604e-07	1.1825e-07	1.1941e-07	1.566e-07	1.5958e-07	9.512e-08	1.6327e-07	1.3499e-07	1.0803e-07	7.463e-08	1.3717e-07	1.4596e-07	1.378e-07	2.5831e-07	1.2377e-07	1.8765e-07	1.6472e-07	1.4607e-07	1.4606e-07	1.6302e-07
PI 37:5	3.741e-08	2.196e-08	2.843e-08	1.402e-08	2.115e-08	3.119e-08	1.996e-08	1.27e-08	4.952e-08	6.917e-08	4.045e-08	3.055e-08	5.434e-08	2.186e-08	7.93e-09	2.681e-08	5.608e-08	2.568e-08	6.002e-08	3.775e-08
PI 37:4	4.931e-08	2.703e-08	7.013e-08	2.571e-08	5.768e-08	4.21e-08	6.531e-08	3.176e-08	1.0353e-07	1.6747e-07	1.1079e-07	8.995e-08	6.21e-08	7.153e-08	2.856e-08	4.537e-08	6.484e-08	6.902e-08	1.3405e-07	5.491e-08
PI 37:3	1.2074e-07	8.953e-08	1.0235e-07	1.0751e-07	1.1728e-07	1.1539e-07	1.6327e-07	1.064e-07	1.4254e-07	1.2378e-07	1.4069e-07	1.188e-07	1.4556e-07	1.3313e-07	9.204e-08	9.486e-08	1.5947e-07	1.1557e-07	1.3606e-07	9.953e-08
PI 37:2	1.3774e-07	9.291e-08	1.3267e-07	1.2388e-07	1.2305e-07	1.1695e-07	1.415e-07	1.2387e-07	1.2454e-07	2.0206e-07	1.2838e-07	1.188e-07	1.3197e-07	1.53e-07	8.093e-08	9.898e-08	1.5246e-07	9.149e-08	1.2205e-07	1.1497e-07
PI 37:1	4.931e-08	3.717e-08	2.843e-08	8.18e-08	9.421e-08	7.329e-08	6.168e-08	2.541e-08	7.202e-08	3.277e-08	5.627e-08	4.243e-08	2.911e-08	3.577e-08	3.65e-08	5.361e-08	3.855e-08	5.297e-08	4.402e-08	3.432e-08
PI 38:6	6.292e-08	2.196e-08	3.98e-08	3.038e-08	7.69e-08	6.549e-08	8.164e-08	7.782e-08	7.202e-08	4.915e-08	4.572e-08	3.734e-08	2.717e-08	5.961e-08	3.491e-08	3.918e-08	4.206e-08	2.087e-08	3.802e-08	3.26e-08
PI 38:5	8.673e-08	4.73e-08	1.327e-08	3.272e-08	8.652e-08	2.807e-08	9.07e-09	3.176e-08	4.802e-08	5.461e-08	4.045e-08	3.904e-08	4.464e-08	4.968e-08	5.078e-08	3.918e-08	7.36e-08	2.729e-08	5.002e-08	4.976e-08
PI 38:4	1.0033e-07	6.588e-08	1.0045e-07	7.246e-08	1.6727e-07	9.512e-08	7.801e-08	7.94e-08	1.2754e-07	1.1104e-07	9.496e-08	8.995e-08	8.345e-08	9.538e-08	7.934e-08	1.2166e-07	1.0339e-07	9.631e-08	8.203e-08	9.266e-08
PI 38:3	2.4828e-07	1.5204e-07	1.3457e-07	2.9683e-07	2.6147e-07	2.4325e-07	2.0318e-07	1.5087e-07	3.121e-07	2.2026e-07	1.8817e-07	2.41e-07	1.5332e-07	1.232e-07	1.333e-07	1.4022e-07	1.7524e-07	9.631e-08	2.2809e-07	1.2527e-07
PI 38:2	1.6495e-07	1.419e-07	1.9711e-07	1.753e-07	1.8457e-07	1.419e-07	1.3062e-07	1.2387e-07	2.5808e-07	2.4757e-07	2.5148e-07	2.7325e-07	2.1737e-07	1.3313e-07	1.5551e-07	1.2785e-07	2.2255e-07	1.9262e-07	1.8608e-07	1.5272e-07
PI 38:1	2.0406e-07	1.0474e-07	1.63e-07	1.566e-07	3.0377e-07	1.5905e-07	1.8141e-07	1.7151e-07	1.6805e-07	2.148e-07	1.9696e-07	1.3577e-07	1.7273e-07	1.4307e-07	1.0156e-07	1.3404e-07	1.0339e-07	1.3804e-07	1.3606e-07	1.1669e-07
LysoPC16:1	1.98968e-06	2.22377e-06	1.41375e-06	1.17003e-06	1.377e-06	7.9921e-07	1.2338e-06	1.92991e-06	3.22546e-06	3.01113e-06	1.23623e-06	2.13794e-06	1.00307e-06	1.28545e-06	1.03261e-06	1.20738e-06	1.27444e-06	2.04069e-06	1.88912e-06	2.6557e-06
LysoPC16:0	1.19687e-05	9.44447e-06	7.99627e-06	6.4212e-06	7.48079e-06	6.87864e-06	8.60247e-06	1.24029e-05	1.40134e-05	7.84812e-06	8.22203e-06	1.14206e-05	8.85184e-06	8.83326e-06	1.08579e-05	1.29961e-05	1.14686e-05	2.80975e-05	1.67336e-05	2.06898e-05
LysoPC18:2	6.39067e-06	7.37782e-06	2.7637e-06	4.08114e-06	6.26474e-06	1.23584e-05	8.22575e-06	1.02675e-05	1.02856e-05	1.0168e-05	7.27334e-06	5.73947e-06	4.8978e-06	6.31733e-06	6.46139e-06	8.32466e-06	9.03632e-06	1.67957e-05	1.16792e-05	2.02146e-05
LysoPC18:1	7.17571e-06	6.56646e-06	5.12687e-06	4.28114e-06	4.01618e-06	3.48196e-06	3.94138e-06	4.55444e-06	7.02442e-06	4.78813e-06	4.36966e-06	4.1e-06	4.07177e-06	2.87168e-06	4.83874e-06	6.35507e-06	5.35791e-06	9.49683e-06	8.11387e-06	1.02259e-05
LysoPC18:0	1.68192e-06	1.77908e-06	1.37134e-06	1.79811e-06	2.06516e-06	1.65544e-06	1.95372e-06	1.59534e-06	1.89915e-06	1.28359e-06	7.4739e-07	1.5518e-06	2.30161e-06	1.03916e-06	2.65544e-06	2.38329e-06	2.201e-06	5.57227e-06	3.16593e-06	3.32943e-06
PC28:2	8.282e-08	1.663e-08	7.552e-08	5.291e-08	1.149e-07	1.8503e-07	6.316e-08	3.291e-08	9.471e-08	1.3834e-07	1.1514e-07	8.965e-08	3.319e-08	6.34e-09	2.297e-08	2.499e-08	2.93e-08	1.813e-08	2.791e-08	4.154e-08
PC28:1	4.4411e-07	4.0663e-07	4.5308e-07	4.3829e-07	5.8358e-07	4.1926e-07	5.6108e-07	3.8653e-07	4.9234e-07	7.3776e-07	9.0478e-07	4.4111e-07	2.9813e-07	3.4179e-07	1.4366e-07	2.182e-07	3.9074e-07	5.5187e-07	3.2563e-07	2.3243e-07
PC29:0	6.925e-07	5.4763e-07	4.7836e-07	3.5523e-07	9.3725e-07	1.13438e-06	6.6627e-07	4.194e-07	5.1124e-07	3.805e-07	6.6631e-07	5.7211e-07	6.7365e-07	2.1521e-07	1.839e-07	3.4917e-07	3.5165e-07	5.2468e-07	4.4671e-07	3.9016e-07
PC30:2	8.3547e-07	5.4763e-07	6.797e-07	5.5173e-07	8.1338e-07	7.8918e-07	5.3999e-07	7.2368e-07	8.0783e-07	1.48707e-06	1.06113e-06	9.0285e-07	4.0851e-07	2.4054e-07	1.2649e-07	1.9954e-07	3.5159e-07	3.8002e-07	5.3039e-07	2.905e-07
PC30:1	9.71711e-06	6.77118e-06	5.86555e-06	2.72032e-06	7.34713e-06	5.95555e-06	4.24981e-06	7.45862e-06	9.99125e-06	1.39492e-05	9.03973e-06	7.47793e-06	5.42161e-06	3.25336e-06	1.63798e-06	2.81187e-06	4.74725e-06	4.27918e-06	3.73095e-06	4.1835e-06
PC30:0	8.9268e-06	7.14474e-06	6.27665e-06	7.97961e-06	5.90603e-06	9.35884e-06	3.82924e-06	6.91593e-06	8.69733e-06	9.22261e-06	8.89997e-06	9.71096e-06	5.84125e-06	1.87987e-06	2.43115e-06	2.58742e-06	6.17342e-06	6.12478e-06	6.77347e-06	8.84841e-06
PC31:2	4.7419e-07	7.1372e-07	8.6417e-07	7.1798e-07	1.22891e-06	1.70161e-06	8.4157e-07	8.9637e-07	2.6512e-07	3.6895e-07	8.7191e-07	9.0988e-07	1.07123e-06	5.4439e-07	8.2185e-07	7.4824e-07	9.8655e-07	1.04035e-06	9.0252e-07	1.25351e-06
PC31:1	2.04732e-06	2.48959e-06	2.29104e-06	2.2065e-06	3.24462e-06	2.47843e-06	1.87936e-06	1.75978e-06	1.71037e-06	2.07508e-06	3.08454e-06	2.48106e-06	2.39621e-06	1.10762e-06	8.1613e-07	1.02873e-06	1.76803e-06	2.0174e-06	1.56304e-06	1.49411e-06
PC31:0	2.89029e-06	2.0165e-06	2.07273e-06	1.5567e-06	3.63378e-06	2.65096e-06	1.9426e-06	3.12499e-06	1.92501e-06	2.53616e-06	2.49241e-06	2.35018e-06	1.83293e-06	1.16462e-06	7.9885e-07	1.41523e-06	1.5922e-06	1.81836e-06	1.76781e-06	2.27443e-06
PC32:3	1.07636e-06	7.9662e-07	8.3074e-07	7.3299e-07	3.27136e-06	2.28119e-06	1.41662e-06	1.96548e-06	1.97549e-06	2.05197e-06	2.97764e-06	1.854e-06	1.5018e-06	5.3171e-07	4.2532e-07	6.4219e-07	1.21131e-06	1.22137e-06	9.5835e-07	7.9691e-07
PC32:2	3.49167e-05	2.12931e-05	2.60804e-05	2.32738e-05	6.32331e-05	3.03577e-05	2.17126e-05	3.02294e-05	3.23467e-05	2.79559e-05	2.86492e-05	3.9209e-05	2.48114e-05	1.11778e-05	8.18992e-06	1.15654e-05	1.25421e-05	1.88355e-05	2.35954e-05	1.41442e-05
PC32:1	0.000100923	8.64613e-05	7.23535e-05	6.31462e-05	6.51604e-05	0.000102206	5.67549e-05	4.09363e-05	0.000101686	0.000167155	0.000139838	0.000119486	5.54089e-05	2.28555e-05	2.62134e-05	2.73641e-05	4.60562e-05	4.71249e-05	4.76468e-05	7.51627e-05
PC32:0	2.61256e-05	2.13844e-05	1.83015e-05	1.45387e-05	4.06966e-05	3.53515e-05	1.96437e-05	1.88399e-05	3.448e-05	3.9e-05	2.16247e-05	3.87748e-05	4.06125e-05	2.20263e-05	1.86443e-05	3.21961e-05	8.24684e-05	7.83126e-05	5.66306e-05	4.4375e-05
PC33:3	3.4625e-07	1.9921e-07	1.7627e-07	1.2844e-07	9.1953e-07	5.9186e-07	2.8752e-07	7.072e-07	5.2388e-07	4.9581e-07	3.9482e-07	3.7213e-07	3.3119e-07	1.772e-07	1.4942e-07	2.1824e-07	5.4699e-07	4.704e-07	3.536e-07	3.2372e-07
PC33:2	3.80854e-06	3.0537e-06	2.5677e-06	2.1914e-06	1.10073e-05	7.00382e-06	5.08448e-06	4.9012e-06	6.1096e-06	6.04076e-06	5.88945e-06	4.50055e-06	1.98756e-06	6.8992e-07	9.2534e-07	1.01623e-06	2.27593e-06	2.51505e-06	1.67475e-06	1.75144e-06
PC33:1	8.19668e-06	6.34812e-06	3.96073e-06	4.26936e-06	1.06538e-05	9.16168e-06	3.88524e-06	5.78099e-06	7.01851e-06	9.15344e-06	7.48527e-06	8.40149e-06	3.27948e-06	2.04442e-06	1.16669e-06	2.01376e-06	5.35296e-06	5.24722e-06	3.94493e-06	4.11711e-06
PC33:0	3.74085e-06	2.68855e-06	2.57611e-06	1.88913e-06	3.44822e-06	3.51419e-06	2.27927e-06	2.33549e-06	3.25047e-06	3.643e-06	4.00571e-06	3.2393e-06	3.33467e-06	1.50637e-06	1.12073e-06	1.82051e-06	4.21984e-06	3.95344e-06	4.02883e-06	3.14594e-06
PC34:4	4.03444e-06	3.32754e-06	2.10626e-06	1.85136e-06	7.5416e-06	6.99131e-06	4.06765e-06	4.83538e-06	6.61455e-06	6.43274e-06	6.2596e-06	7.15402e-06	4.74815e-06	3.03177e-06	1.56329e-06	3.14233e-06	5.91935e-06	4.12535e-06	5.38711e-06	5.84376e-06
PC34:3	7.47925e-05	6.08584e-05	5.36636e-05	4.16964e-05	0.000123463	0.000149997	0.000111627	8.90352e-05	9.24572e-05	9.22035e-05	0.000120814	0.000114871	0.000103527	3.18686e-05	3.2047e-05	5.64593e-05	7.26349e-05	9.05312e-05	6.1026e-05	9.95042e-05
PC34:2	0.000233772	0.000206954	0.000186226	0.000170278	0.000624478	0.000554369	0.000359745	0.00038131	0.00041865	0.000372988	0.000502782	0.000430929	0.000370683	0.000179158	0.000151973	0.000145641	0.000318482	0.000319691	0.000263654	0.000290685
PC34:1	0.00013741	0.00012591	7.63725e-05	8.57882e-05	0.000152623	0.000179989	0.000113571	0.000143577	0.000165331	0.000140847	0.00015828	0.000125676	0.000136565	5.95708e-05	3.75128e-05	7.12211e-05	0.000123988	8.71706e-05	8.66189e-05	8.97503e-05
PC34:0	1.94192e-05	1.36008e-05	1.00696e-05	8.57658e-06	1.82838e-05	1.43281e-05	9.77633e-06	1.34289e-05	1.49079e-05	1.42603e-05	1.51348e-05	1.28055e-05	1.91689e-05	7.08256e-06	7.29338e-06	1.1715e-05	2.10011e-05	1.88174e-05	1.61799e-05	1.524e-05
PC35:3	1.97199e-06	1.82561e-06	2.28248e-06	1.3073e-06	1.02205e-05	7.34895e-06	5.03538e-06	5.64131e-06	4.32342e-06	5.86783e-06	6.43233e-06	5.90649e-06	3.47817e-06	1.72793e-06	1.09773e-06	1.29055e-06	4.22951e-06	4.98483e-06	3.95436e-06	4.93887e-06
PC35:2	8.06125e-06	5.70082e-06	5.88232e-06	3.21905e-06	2.9645e-05	2.15413e-05	1.36615e-05	1.37003e-05	1.28566e-05	1.373e-05	1.55625e-05	1.56794e-05	8.39195e-06	3.32932e-06	3.06334e-06	4.78826e-06	1.32356e-05	1.52348e-05	1.26352e-05	1.21273e-05
PC35:1	5.62997e-06	4.23205e-06	3.40686e-06	2.72041e-06	8.24019e-06	5.6227e-06	4.15185e-06	4.85186e-06	4.80308e-06	7.22811e-06	6.11978e-06	5.52055e-06	3.57761e-06	1.89248e-06	1.18397e-06	1.81434e-06	5.03056e-06	2.69591e-06	4.27067e-06	3.32852e-06
PC36:4	8.59404e-05	5.74774e-05	6.82728e-05	5.64435e-05	0.000340485	0.000237805	0.000266859	0.000248229	0.000134812	0.000153927	0.000105991	0.000155068	0.000111191	9.76239e-05	9.05768e-05	8.94236e-05	0.000161836	9.39247e-05	9.83301e-05	0.000122738
PC36:3	0.000141401	0.000100887	6.69789e-05	8.79613e-05	0.000299184	0.000292695	0.000186369	0.000188574	0.000162033	0.000176284	0.000196083	0.00018452	0.000138325	4.41823e-05	6.03745e-05	8.65837e-05	0.000107965	4.78757e-05	6.07824e-05	6.36851e-05
PC36:2	8.76884e-05	6.57141e-05	6.1701e-05	4.3615e-05	0.000167681	8.72986e-05	3.38662e-05	8.25988e-05	6.5127e-05	9.26325e-05	8.75631e-05	8.93586e-05	6.61638e-05	4.16294e-05	2.9955e-05	5.55127e-05	7.26797e-05	7.11732e-05	6.46934e-05	5.56133e-05
PC36:1	1.32321e-05	1.18332e-05	1.09004e-05	6.44557e-06	2.53127e-05	1.30086e-05	1.10526e-05	1.26886e-05	1.38349e-05	1.64738e-05	1.59821e-05	1.06139e-05	1.65188e-05	7.57633e-06	7.18985e-06	9.2336e-06	1.64591e-05	1.03495e-05	1.30537e-05	8.84019e-06
PC38:4	5.7955e-07	4.3152e-07	3.105e-07	3.0223e-07	1.07868e-06	6.9056e-07	3.6465e-07	7.3187e-07	7.1952e-07	1.04902e-06	7.0737e-07	5.2381e-07	1.11522e-06	5.3167e-07	3.1035e-07	3.8033e-07	8.303e-07	5.1567e-07	5.2101e-07	4.8977e-07
PC38:3	8.9567e-07	4.5641e-07	4.9507e-07	3.8538e-07	1.4411e-06	1.30706e-06	9.9583e-07	9.2104e-07	8.5206e-07	1.51017e-06	1.13511e-06	8.1328e-07	8.7227e-07	4.3677e-07	3.4487e-07	5.2996e-07	8.0094e-07	7.1472e-07	5.1164e-07	6.8898e-07
Total	wt-1	wt-2	wt-3	wt-4	pect29-1	pect29-2	pect29-3	pect29-4	pect29;GMR-psd-1	pect29;GMR-psd-2	pect29;GMR-psd-3	pect29;GMR-psd-4	wt D9-1	wt D9-2	wt D9-3	wt D9-4	pect29;GMR-psd D9-1	pect29;GMR-psd D9-2	pect29;GMR-psd D9-3	pect29;GMR-psd D9-4
PC	0.00102007	0.000822088	0.000694572	0.00063734	0.00203188	0.00178813	0.00124678	0.00131754	0.00130921	0.00138183	0.00147685	0.00140021	0.00113357	0.000549404	0.000488304	0.000623956	0.00109616	0.00094224	0.00084652	0.0009363
PE	0.000718464	0.000637326	0.0005684	0.000593616	0.000536506	0.000441078	0.000403994	0.000416956	0.000446892	0.000468878	0.000642605	0.000487777	0.000539143	0.000536583	0.000549776	0.000536278	0.000390623	0.000532421	0.000437304	0.000417196
PS	0.000292119	0.000214559	0.00021501	0.000218011	0.000279237	0.000205757	0.00019779	0.000194076	0.00016755	0.000159784	0.000155994	0.000158533	0.000204271	0.00019605	0.000168373	0.00015857	0.000100846	0.000125863	8.21869e-05	0.000102962
PA	1.16016e-05	1.01442e-05	9.11309e-06	1.07359e-05	1.18275e-05	1.01626e-05	9.73902e-06	9.11083e-06	1.09829e-05	9.5809e-06	1.14186e-05	9.60674e-06	8.03783e-06	7.96696e-06	7.60315e-06	7.96335e-06	7.35135e-06	9.33025e-06	6.34063e-06	8.57086e-06
PI	0.000101795	8.69676e-05	0.000100163	0.000111178	0.000143198	0.000117548	0.00013653	0.00011953	0.000146555	0.00013928	0.000133069	0.000130997	8.07262e-05	8.54975e-05	6.90988e-05	8.61861e-05	0.00010157	9.65681e-05	0.000114305	9.57097e-05
PG	2.24242e-05	1.85823e-05	1.82154e-05	1.84824e-05	2.27049e-05	1.90789e-05	2.01742e-05	1.99996e-05	1.76333e-05	1.87245e-05	1.86999e-05	1.67637e-05	2.14197e-05	1.86823e-05	2.02103e-05	2.73438e-05	1.29703e-05	1.56323e-05	1.412e-05	1.37869e-05
CL	6.74748e-05	4.39376e-05	4.00387e-05	4.88773e-05	4.49974e-05	3.05273e-05	3.42469e-05	3.7446e-05	4.49433e-05	4.63401e-05	4.40772e-05	5.17111e-05	3.16481e-05	2.37741e-05	2.45155e-05	2.93319e-05	3.77414e-05	3.62156e-05	2.72646e-05	3.00037e-05
LPC	2.92067e-05	2.73916e-05	1.86719e-05	1.77516e-05	2.12039e-05	2.51736e-05	2.39571e-05	3.075e-05	3.6448e-05	2.7099e-05	2.18487e-05	2.49498e-05	2.11261e-05	2.03469e-05	2.58461e-05	3.12665e-05	2.93383e-05	6.2003e-05	4.15817e-05	5.71154e-05
LPI	3.54129e-06	2.30002e-06	2.53098e-06	3.68041e-06	4.93192e-06	3.20157e-06	3.71721e-06	3.82155e-06	3.06199e-06	2.66101e-06	2.51559e-06	3.07858e-06	1.05857e-06	2.81745e-06	1.6697e-06	2.91527e-06	2.26503e-06	1.12541e-06	2.23699e-06	2.72717e-06
LPE	0.000307602	0.000340899	0.000265047	0.000376925	0.000119292	0.000139089	0.000103881	0.000154177	0.000106005	0.000103591	0.000151708	0.000147911	0.000292335	0.000284054	0.000336592	0.000381797	0.000256753	0.000464194	0.000384401	0.000342467
LPS	8.23135e-06	6.32481e-06	6.59969e-06	7.15811e-06	7.66707e-06	5.65909e-06	4.72798e-06	6.82616e-06	4.33103e-06	4.13054e-06	3.85354e-06	3.47095e-06	4.85172e-06	6.52071e-06	6.41953e-06	6.33237e-06	3.53326e-06	2.46802e-06	2.47151e-06	3.23931e-06
